# Supplementary material for: The weather of 1740, the coldest year in central Europe in 600 years
Source: Copernicus journal article supplement (doi:10.5194/cp-20-2219-2024), 2024-10-07
Supplement: Supplementary file 1 [file cp-20-2219-2024-supplement.pdf]

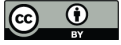

*Supplement of*

## **The weather of 1740, the coldest year in central Europe in 600 years**

**Stefan Brönnimann et al.**

*Correspondence to:* Stefan Brönnimann (stefan.broennimann@giub.unibe.ch)

The copyright of individual parts of the supplement might differ from the article licence.

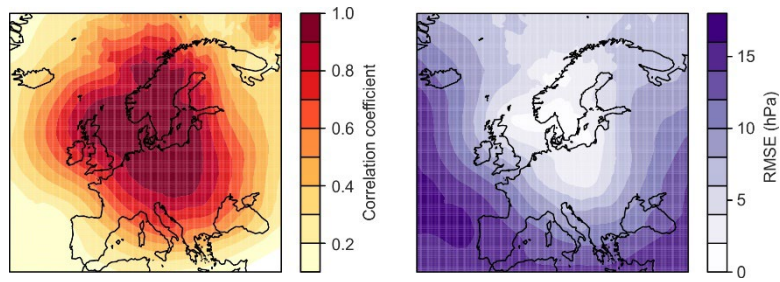

1  
2  
3  
4

**Fig. S1.** Cross-validation of analog sea-level pressure reconstruction within ERA5. The year 1940 was reconstructed based on the years 1941-2022 in ERA5. Left: Correlation coefficient, right: root mean squared error.

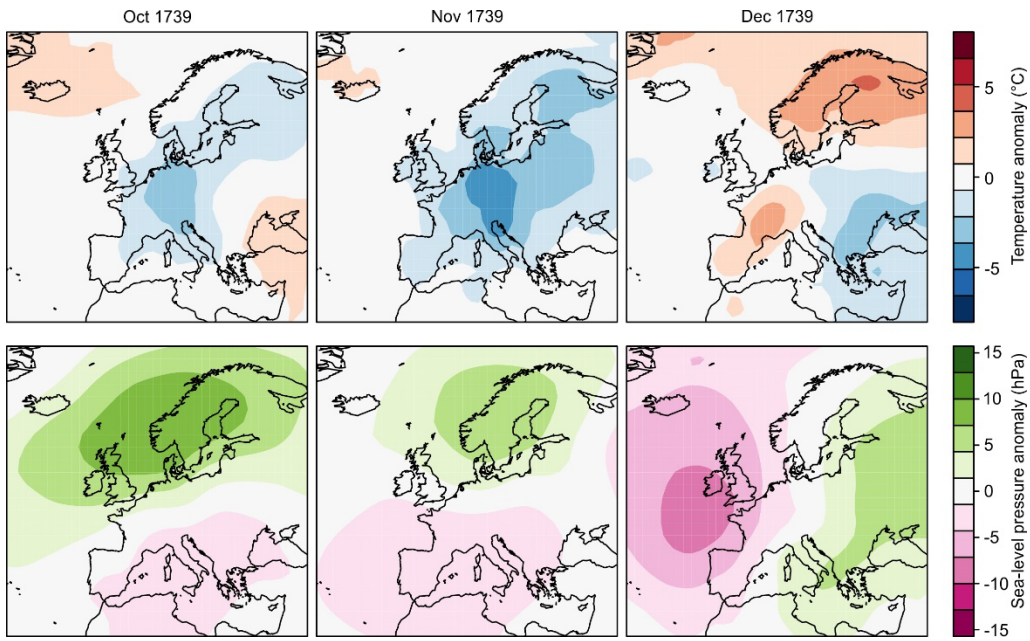

5  
6  
7

**Fig. S2.** Monthly anomalies (with respect to 1710-1739) of (top) temperature and (bottom) sea-level pressure in Oct-Dec 1739 in the ModE-RA ensemble mean.

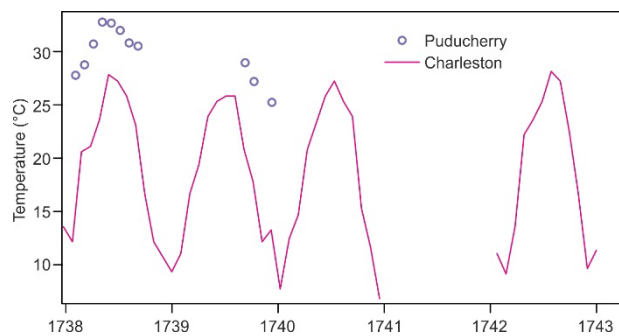

8  
9

**Fig. S3.** The only two available non-European temperature series that cover the boreal winter 1739/40

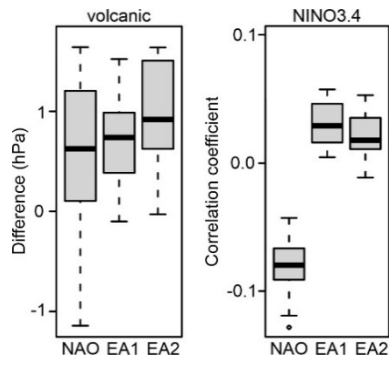

10

11 **Fig. S4.** Left: Averaged NAO and EA indices in ModE-RA following volcanic eruptions in 1710-2000  
 12 (expressed as anomalies from the average of all years). Right: Correlations between NINO3.4 (Sep-Feb) and  
 13 indices of NAO (Jan-Feb) and EA1 and EA2 (Mar-May) in ModE-RA in 1710-2000. The box plots show the  
 14 distribution of the ModE-RA members.
